# Supplementary material for: Regulation of hepatic circadian metabolism by the E3 ubiquitin ligase HRD1-controlled CREBH/PPARα transcriptional program
Source: PubMed Central journal article supplement — Mol Metab. 2021 Feb 13;49:101192. doi: 10.1016/j.molmet.2021.101192 (PMC7966871; doi:10.1016/j.molmet.2021.101192), 2021-02-13
Supplement: mmc1.pdf [file mmc1.pdf]

# Regulation of Hepatic Circadian Metabolism by the E3 ubiquitin ligase HRD1-controlled CREBH/PPAR $\alpha$ Transcriptional Program

Hyunbae Kim <sup>1#</sup>, Juncheng Wei <sup>3,#</sup>, Zhenfeng Song <sup>1</sup>, Emilio Mottillo <sup>7</sup>, Lobelia Samavati <sup>1</sup>, Ren Zhang <sup>1</sup>, Li Li <sup>1</sup>, Xuequn Chen <sup>5</sup>, Bhanu P. Jena <sup>5,6</sup>, Jiandie D. Lin <sup>4</sup>, Deyu Fang <sup>3\*</sup> and Kezhong Zhang <sup>1,2,6\*</sup>

<sup>1</sup> Center for Molecular Medicine and Genetics, <sup>2</sup> Department of Biochemistry, Microbiology, and Immunology, <sup>5</sup> Department of Physiology, Wayne State University School of Medicine, Detroit, MI 48201, USA.

<sup>3</sup> Department of Pathology, Northwestern University Feinberg School of Medicine, Chicago, IL, 60611, USA.

<sup>4</sup> Life Sciences Institute and Department of Cell & Developmental Biology, University of Michigan Medical School, Ann Arbor, MI 48109, USA.

<sup>6</sup> NanoBioScience Institute, Wayne State University, Detroit, MI 48201, USA

<sup>7</sup> Hypertension and Vascular Research Division, Henry Ford Hospital, Detroit, MI 48202, USA

# H.K. and J.W. contributed equally to this work

\* Corresponding Author:

Kezhong Zhang, Ph.D.

Center for Molecular Medicine and Genetics

Wayne State University School of Medicine

Detroit, MI 48201, USA

Phone: 313-577-2669

Email: [kzhang@med.wayne.edu](mailto:kzhang@med.wayne.edu)

Deyu Fang, Ph.D.

Department of Pathology

Northwestern University Feinberg School of Medicine

Chicago, IL 60611, USA.

Phone: 312-503-3021

Email: [fangd@northwestern.edu](mailto:fangd@northwestern.edu)

**Online supplemental material**

**S-Table 1. Mouse gene primer information for qPCR used in this study**

| <b>Gene name</b> | <b>Forward</b>                 | <b>Reverse</b>                |
|------------------|--------------------------------|-------------------------------|
| Hrd1             | GCTTCCCCACCAATTCCTGA           | GCATCAGGCTCTCCATCCTC          |
| Sel1L            | CTCCAAGACCCAGGAGGAAGA          | TTCTTCAGCTTCAATGGCAGTC        |
| CrebH            | TCGTGCCAGTGCGAGTGT             | AGCCACGCGGGATGC               |
| LC3b             | GCTCTTTGTTGGTGTGTA             | TCTTCTGTTGCTGTTGTC            |
| Atg7             | CAGAAGAAGTTGAACGAGTA           | CAGAGTCACCATTGTAGTAAT         |
| Acot4            | CTTTGCCACATTGGCTCTGG           | ATGTCGAAGCATGTACCGCA          |
| Bdh1             | AGATGCGGCTAGTGGCAAAG           | CAGTTCCTTGACCCCAGCAT          |
| Cpt1a            | AGAATCTCATTGGCCACCAG           | CAG GGTCTCACTCTCCTTGC         |
| Hmgcs1           | GGAGAGTTTCCAGCGCTTTG           | CTTGGCAACCTCAGCAACTT          |
| Apoc2            | CTC TGC TGG GCA CGG TGC A      | GCC GCC GAG CTT TTG CTG TAC   |
| Lcat             | GCT CTG TGG CCA GTG GCA GG     | AGG AGT GCG GTA GGC ACC CA    |
| Fads2            | GCT CTC AGA TCA CCG AGG AC     | AGT GCC GAA GTA CGA GAG GA    |
| Fgf21            | GTG TCA AAG CCT CTA GGT TTC TT | GGT ACA CAT TGT AAC CGT CCT C |
| Ppara $\alpha$   | GAAGGGCACACGCGTGCGAGTTTTCAG    | CTGTGATGACAACGTCTTGTTCCCGAACT |
| Pck1             | CTCAGCTGCATAACGGTCTG           | CTTCAGCTTGCGGATGACAC          |
| G6pc             | CTGTACCTGTGAGACCGGA            | AGATGACGTTCAAACACCGGAA        |
| $\beta$ -actin   | GATCTGGCACCACCTTCT             | GGGGTGTGTAAGGTCTCAA           |

**S-Table 2. Primer information for ChIP assay used in this study**

| <b>Chromatin Immunoprecipitation assay</b> |                       |                       |
|--------------------------------------------|-----------------------|-----------------------|
| <b>Gene name</b>                           | <b>Forward</b>        | <b>Reverse</b>        |
| Ms Hrd1                                    | CCTGTTGTGATCCCCAACCAT | CCAAAGGGCTTACGACTCACA |
| Ms Sel1L                                   | TGATGCAAACGTACAGCAGC  | GCCACTCAAAGGGATTG     |

## S-Figure 1

CREBH- or PPAR $\alpha$ - binding sites in the promoter regions of human and mouse *HRD1* and *Sell* genes. Highlighted red bases indicate transcription start sites. The primer locations and sequences for ChIP analyses were also indicated. CRE, CREBH-binding element; PPRE, PPAR $\alpha$ -binding element.

### A. Human *HRD1* Promoter

(HPRM51308 NM\_032431;name=SYVN1;Entrez\_ID=84447)

GACCTGGCGCCAATCCTAGGACAGGTTTTGGTAAGCCTTTGAATTTCAATTGCCCCACGT  
TTCGGGGGAGGGGGTAGCACCCCTAGCTCATAAACCTTAGTGATTGATGATTAAATGAG  
ATGACGGAGGAAAACGCAAGGCACAAAGTGGATGCATTAGCTCCATTTTGTTAATCAGCA  
GGCTTAGTTGGCTGCGACCCAGACACGAACTAAAATACAGTGCAGCCCAGGACCAGTGGG  
GGTCTTGCTTATGGCTCAGAGCTGAACAACACATGGGCAGCAAAATCAGACACTGAGATG  
CGGGCAGGCCTGCGACGC**TGAAGTCA**ATTCCCTTTGAACAAACAGAACACTTCCGTCCCAA  
GATTAGCAGGAATTAATCTCCCAGTCTCGGGTACACCTGGTTGTCCCTCCCTGTCTGGC  
GCGGCAAACGTTCCCGGAGGCCAGCCAGGGATCACTCGCCCAAGGACTGAGCTTTCCTTA  
CTCTCAGCCAACTGGAGCGGGACCAGGGCCTAGGCAACGCAGCTGTCCGCCCTAACAAAC  
CACTCACCTGCTTTCCTTTCTATAGGCCAGCAAAGGTACATTCTTTTTTCTTATTGGGC  
CGCGTAACTTATCGCAACCAATCAGTGGCAGCCACGGGACCAACTCACTCCACACAAC  
TTGTGGGGGTGATCATGGAGAAGACAAATTTTTGTTTTCCGCATCCAGTTCTCTCAGAGA  
GCACCGTATTTGTCAAACCTGTTGTGACTCTCCCTAAATGTTTAAGAAAACATTTCAATCC  
CCTCAGGCTTGTATAGTCTGTCCCTGGCCTACTCCCCGCTCCAGGTGGTACAGCCCGCAA  
GCGGCTCCCCTTCCAGCTGCTCGCGGGGCCGAGTCCCCCAGTCCGAGGAGGCCACTCAG  
CGCAGGAGCCATAACCATCTGTGACTAATAAATAATAGGGGGACCTCCGACTCCCCCTGT  
TGCTTATTACCTTCCGACCACCTCTCGGACCTCTTGCCAGCCCTTCCCCGTAGACATC  
ACCCAGATACGGTGGTACACCATTGCTATGGGCCACGTAGGGCGCAGTGCGAGCCAG  
GGCAGGACGCACTTGGTACGACCCACGCCGCGCCCCGCGCCGCGGAAGTGAGGTGTC**TG**  
**ACCC**CCGAAGTTCCGGTTCGCA**G**GGGGTGGGGAGTGTTGTTAACC GGAGGGGCAGCCGCA  
GTCGCGCGGATTGAGCGGGCTCGCGGCGCTGGGTTCTGGTGAGTGGGGCGAAGTCTGGC

 PPRE  
 CRE

### B. Human *SEL1L* Promoter

(HPRM39386 M\_001244984;name=SEL1L;Entrez\_ID=6400)

CTCAAATTCAACTAGCTGTGGCATTCTTCTCAGTGCTCTTATCACTATGCCCAATTTAAA  
TTTTTTAAATAAAACAGGAAAAGATGCTAAACACATTACAAGTTCTTAAAATTATTCCTT  
AATATTTATTTTGGGTCAATTTAAAAGGCTTGTGAATCCATAGCCTTGAGTTAATATTT  
AGCCAGGTGTTAGTTAAATTTCAACTTCAACAGTCACCCGCACTTGTAATCTTGCCCT  
ACGATGGACTACGTTTCCCAAGAGCACCCCGAGTTAATCACATGAAGCGCATTCTGGG  
AATTGTAGTCTCGGATGAGCCTCTTCTCCAGTCTTGGACTCACGCGCTGATTCCGGTT  
GAACCCAGGGGCTACCAATTAGCTGGGGCCATGTCCGTGAGTCGTGGTCCAACCGAGAAA  
GCTGGTGTGGGAGCTTCGTACAATGATTGGCCAATGAA**TGACCCC**CGGGGCGGAGCAATG  
GGGGTGGGCGGGGAGCCATGGTGATTGGACCAGAAGCCCGCGACGGCGGGCGGGGATTG

GCTGCGCGCTGGGTGAGGGAAGCCTGGGAAGGGGCGGAGGAAGGAGACTAGAGCAGGAAG  
AGCAGCGGCGAGGCGGCGGTGGTGGCTGAGTCC

PPRE

### C. Mouse *Hrd1* promoter (MPRM46266 NM\_028769;name=Syvn1;Entrez\_ID=74126)

ACCTGGGGGAGAGGAGGGATTGCCACAAAATGTAGGAGATTTTCAAGAATGGGGGAGGAT  
GAGTGTGTAGGGTTAAAGGTAGCCAGTAGAAGTTCATAGCTAGCCTTATGGAGGAAGGAA  
AGGGGAGCCATCTCGGGATGTTAACTGTTAAAGACAACAGGTGGTGGTGAAGATGGCTGA  
GACCAAGAGCACAGGGCTGAGGGGCAGACAGGCACTGACACTGCTACCCTTAATACAGT  
TCCTCCTGTTGTGATCCCCAACCATAATTACTTCGTTGCTACTTCATAACTGTAATTTTG  
CTAGTTATGAATTGTAAGTAAACGTCTGATATGCAGGATATCTCATTTG**TGACCCCT**GTG  
TAACGGTTTGATTCCCAAAGGGCTTACGACTCACAGGTTGAGAGCCAGCCACTGCCTTAA  
AGTCGTCTAGAATCAGTTTTCTTTCTTTTTTGACAGACAAGATGTTTAATTCCGTTGTAC  
TGAAGGAAAGCCATTTTATGTATTTTCTTAAGTGCTCTATCAGTAATGACAATTCTGAA  
AGCCCCTGTGTTATATTTTAACAACACAGTCACCTCCGGTCTGTATTCACTGTCCGTGT  
TGTGACTCCACAGTATAAATTCCTCCAGTTGATCTTCATGAATTCTTATATTTGATCCC  
CCCCCCCCTTAGGCCTCTGAATTCCGAGTGAGTCCGAGTTAAAAATGGGAGGAGCACCCCT  
CTAGCTGATAAACCTGGGTAATGAGGTGTCCGCTTTCAGTTTCCATTCTGTACGCGACTA  
T**ACTGCTTGT**GTGAGCCCTAACAGACAGAATCAGCTCAGAACAAAGGGTCTGGCTATCTC  
CCAGGGATGAACACGCACGCCGACTGAGCTTTTTGGGGTGTGAAAAGTCAACGCCTTCGC  
ACAGAACTCTCCACCCCAACCTAGAAATAACTGGCGTTCTGTTTTATGTCAGTCCGGACA  
CGCAAGCACTGCTCCTTTTTCGGGCCCCGTAAGCATCCCCCAGGCGGGATAGGGATCCC  
CGGCCTATGGACTGCGCTTCTCAGCTGGCATCCAGCTGCCTTGGCACCCAGTCCGGGGC  
CACTCTGCCTACAGACCCTAGCAACCACTCACCTGCTTTTCTTTCCCTATAGGCCAGAAA  
TTTTTCCTTTCTTTTCTCATTGGTCCGCGTAACCTTTATCGCAACCAATCGGCGGTAGCCA  
CGGGAACAAACTCACTCCTACACAACC**T**GCGTTGGGGGAGGTAACCTGGGAAGACCTAT  
ATCTGTTTTCTGCACCGCTATTTTTTTCCGAGAAGCACTTAACCTTCTTACCGTGTCTAG  
CTATCCCTGGAATGAGGCGCTTACACATTTTATTTCTTTTCATGCCTGACATAAAGTCTGG  
CCCTTGCTCGCTCCTGCCCC

PPRE  
Primer for PPRE  
CRE  
Primer for CRE

### D. Mouse *Sel1L* promoter (MPRM31536 NM\_001039089;name=Sel1l;Entrez\_ID=20338)

CTCCATCCTATACACCTTTATGCGCATGGTGCACGCACACACACACTGAGGGGGTGT  
GGGGGCATGGGGGAAACTGTTCCCATGCCCTCTGATGCAAACGTACAGCAGCTAATTT  
TTTAACATCTTCTTAAAAATAATGACTGCCAAAAAGATAGAAAACAAGTGTTCAGAGAA

GTCAAGACACTGAGACAGGAAAGACTTTCCCCCTAACCCCTGCTGAGTTCTGTATGCA  
GTGCTGGAAAATAAATCTTAGAAGGATTCAATTTGATTAAGAAGACTGAAAAGCATCAAG  
ATGCTGCCCTGCCACTCAAAGGGATTGTGCGTGCATCGGTACTIONACTACATAACTATTGC  
AATCCCTGAAGTGCCTTGGCTCTCACCTCTGTGGCCACACAAACCATCTAATCCCTTTTC  
TGGTCAAGGAAAAAGAGAGCATTGCAATATTTCACTAGAGAAGAATGAGGACCAGTGTTT  
GAAGGGTTTGGGAGAGCTGTTAGAACATTTATTGAGTGGCTAATATATATGGAAGCCTTA  
GTGAAAACAATCACAGGAGCTGAACTAATCTCCACTGGTAGGAATTTCTTCCCTTTTGT  
TTATTAGGGAAATGACAAGCGGCATTGTCTTGTACTGCTGGCTCTGTAAACTTCACGTAT  
TGCTTCACCTAAGCTTTTTTTTTTTAAGACTTAAGTATTTTTTTTTTAATAAATATTTAAA  
ATTTTCAGTTCAGGTATAGCTTATTTCTCAGCGTTCATATCATGTCCAGTTCAAGTTCTC  
AAAATAATTAAGAAATACTTAGCAACCTTGCAAGTTCTTAACCGTTTGATATCTGTT  
CCTTGATAATTATTCTGGTTCAAACGCAAGAGTCCAGTGAATCATTCTTGAAACTCCT  
TATGCCCTCAGCCACCTGCGGCTTCTAACCTGACTTTATGCTAAACTGCATCTCCAAGA  
GCATCGGCCGAGAAAATCTAGTGCGGTGCATGGTGGGAGTTGTAGTCCTGGATGAGGGT  
TCCCCCGCCTTCGAGCCGCTGATTCAGGCGCTACCAATTAGCTGGGGCCATGTCGGTGAG  
GCCGTGGTCCAACCGGAAAGCTGGTATGACAACGTACACAATGATTGGCTAAAAGATG  
ACATAGGGGGCGTGACTATGTGTGGGGTGGGGCGATCACGGCCATTGGCCAAGGAGGACG  
GAGCGGCGGGCGCGGATTGGCTGCGCTCTGGGCCAGGGAGGCCTGGGAAGGGGCGAAGAA  
GGAACCTGAGCAGGAAGAGCGGCTGCGAGGCGGCGGCACAGAGGCAG

 PPRE 1  
 Primer for PPRE 1  
 PPRE 2

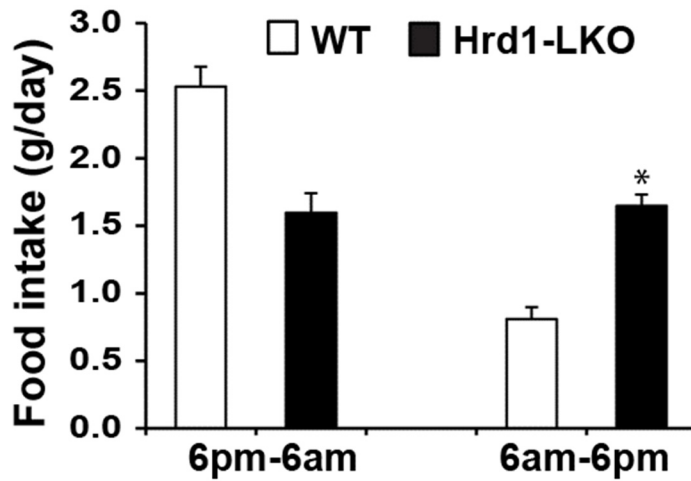

**S-Figure 2. Profiles of food intakes of HRD1 LKO and WT control mice under the circadian clock.** Circadian rhythmic profiles of food consumption of HRD1 LKO vs WT control mice under the circadian clock, determined through the comprehensive metabolic cage PhenoMaster System. The graphs show quantification of food intakes of HRD1 LKO and WT control mice during the nighttime (6 PM – 6 AM) and daytime (6 AM – 6 PM) periods. Each bar donates mean  $\pm$  SEM (n=6 mice). \*  $p < 0.05$ .

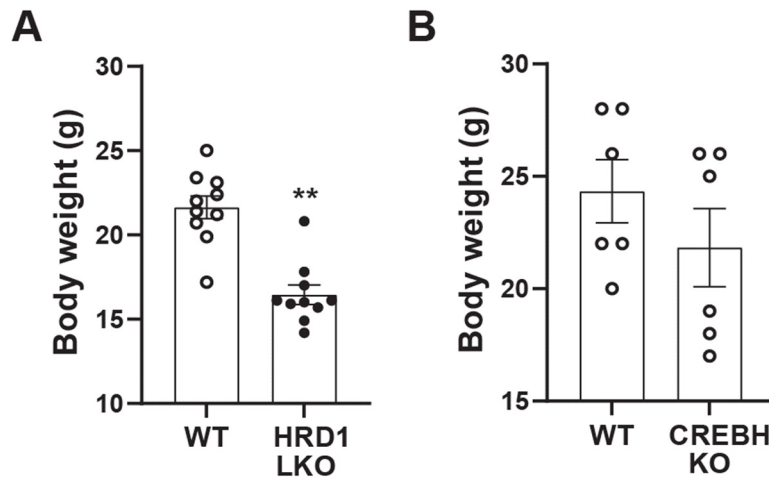

**S-Figure 3. Body weights of HRD1 LKO, CREBH KO and their WT control mice.** (A) Body weights of HRD1 LKO and WT control mice. Each bar donates mean  $\pm$  SEM (n=10 mice). \*\* p < 0.01. (B) Body weights of CREBH KO and WT control mice. Each bar donates mean  $\pm$  SEM (n=6 mice).

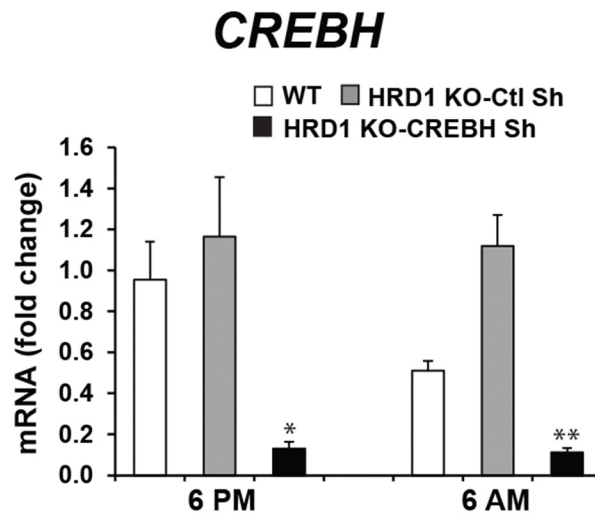

**S-Figure 4. Expression levels of the *Crebh* mRNA in the livers of WT or HRD1 LKO mice infected with recombinant adenovirus expressing CREBH shRNA or control shRNA at the representative nighttime (6 PM) or daytime (6 AM) period.** Levels of mRNA were determined by qPCR. Fold changes of mRNA levels were calculated by comparing to the level in one of the WT mice at 6 PM. Data are mean  $\pm$  SEM (n = 3 mice/genotype/time point). \*P < 0.05 and \*\*P < 0.01 for HRD1 KO-CREBH shRNA vs. HRD1 KO-ctl shRNA.



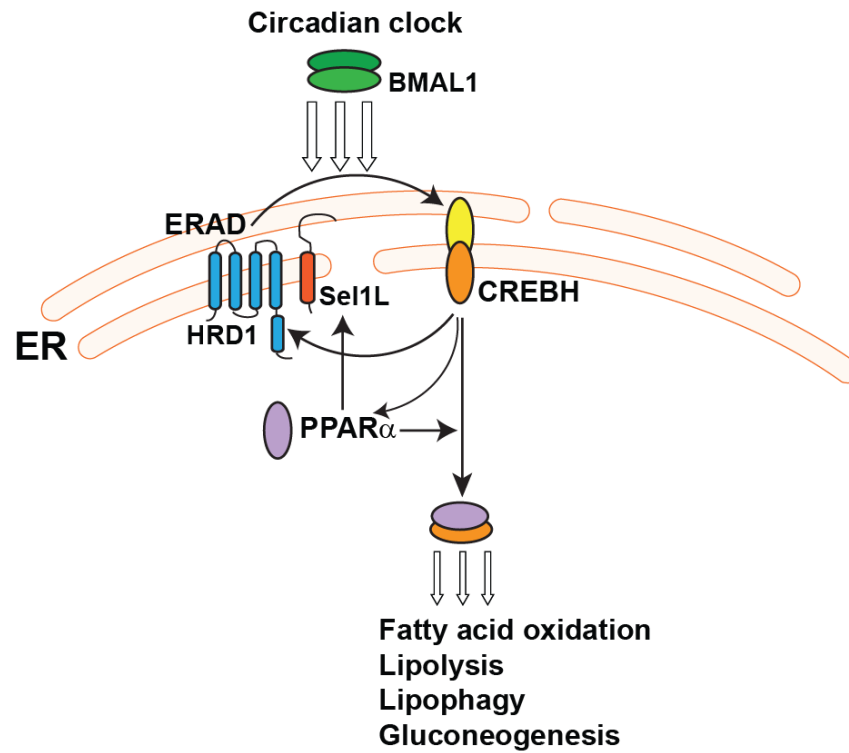

**S-Figure 5.** Illustration of circadian-controlled HRD1/Se1L-CREBH/PPAR $\alpha$  regulatory axis in maintaining energy homeostasis.

## Uncropped immunoblots for Figure 1A

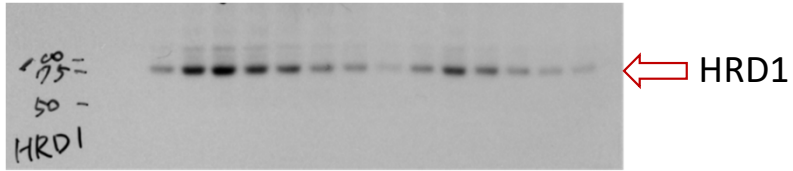

**Figure 1A:** Western blot for HRD1. The arrow shows the cropped ROI.

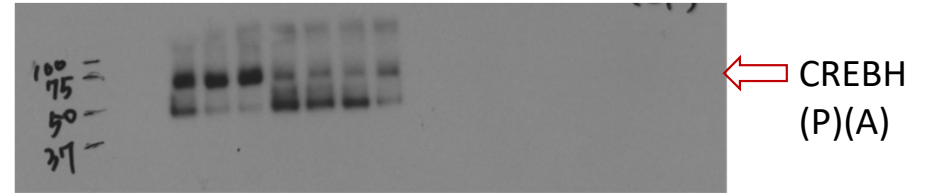

**Figure 1A:** Western blot for CREBH. The arrow shows the cropped ROI.

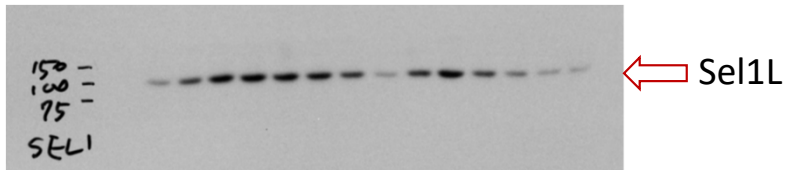

**Figure 1A:** Western blot for Sel1L. The arrow shows the cropped ROI.

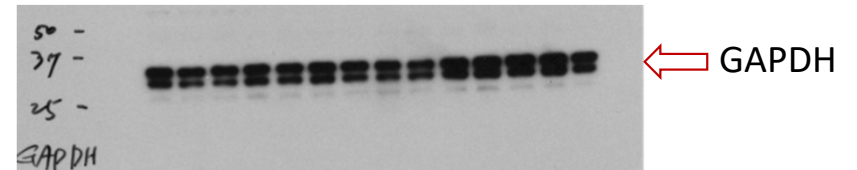

**Figure 1A:** Western blot for GAPDH. The arrow shows the cropped ROI.

Uncropped images for **Figure 2B, 2C, 2D**

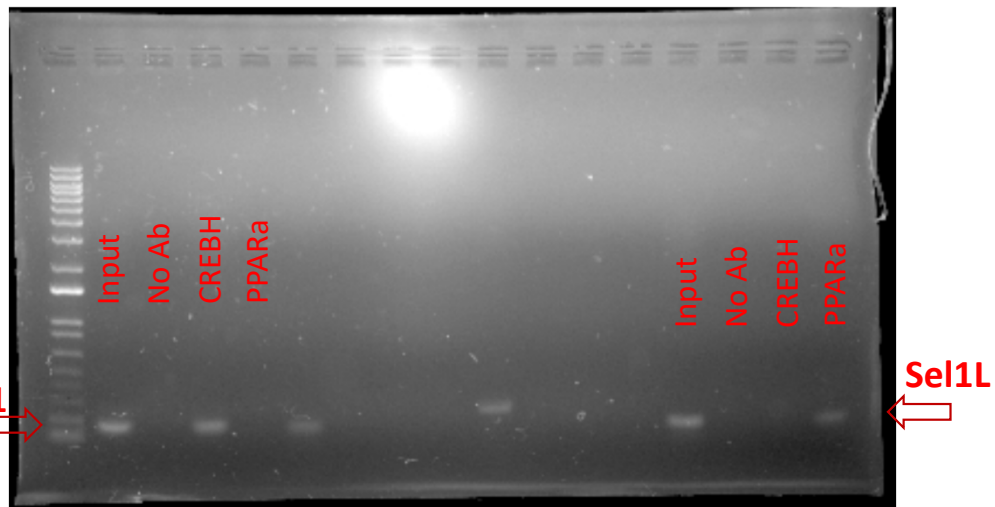

**Figure 2B:** ChIP assay image for CREBH- and PPAR $\alpha$ -binding activities in *HRD1* or *Sel1L* gene promoters.

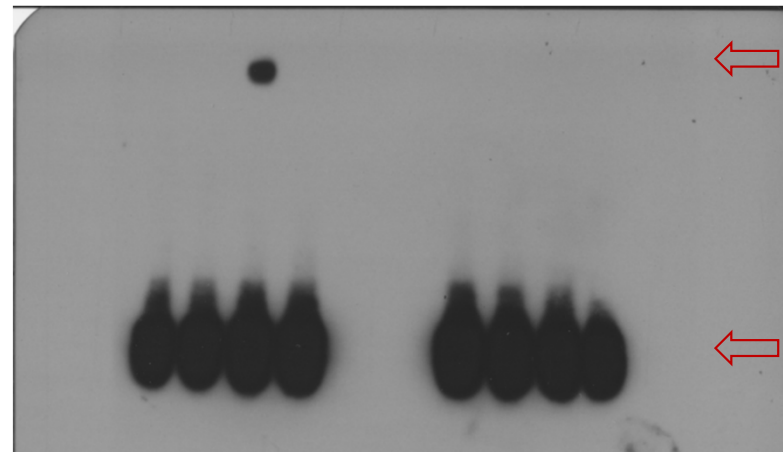

**Figure 2C:** EMSA assay image. The arrow shows the cropped ROI.

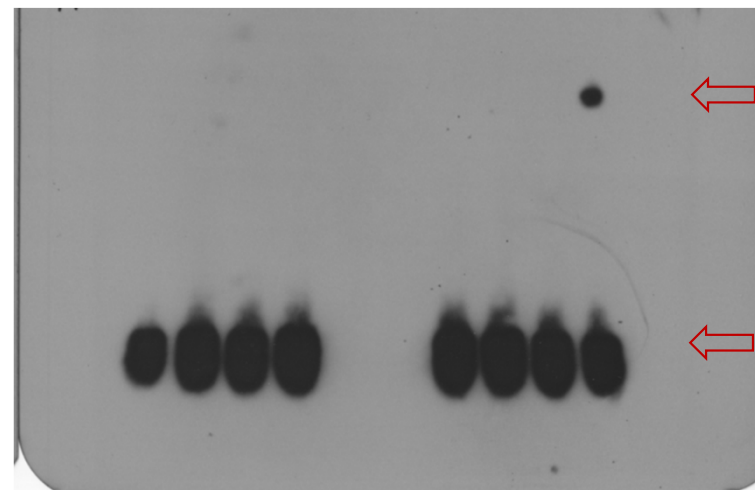

**Figure 2D:** EMSA assay image. The arrow shows the cropped ROI.

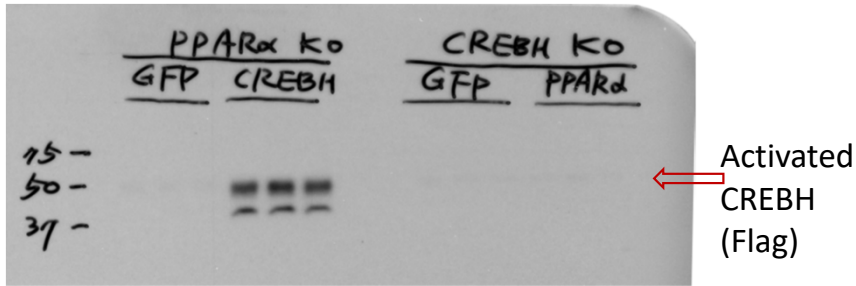

**Figure 2G:** Western blot image for activated CREBH. The arrow shows the cropped ROI.

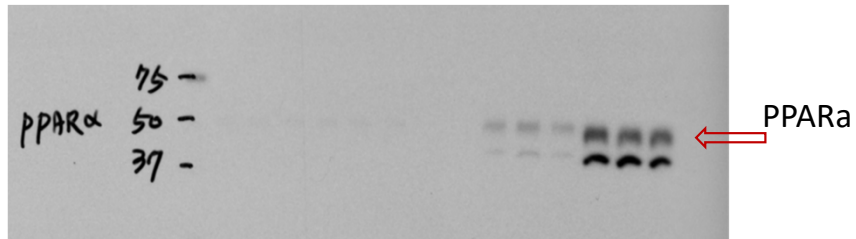

**Figure 2G:** Western blot image for PPARα. The arrow shows the cropped ROI.

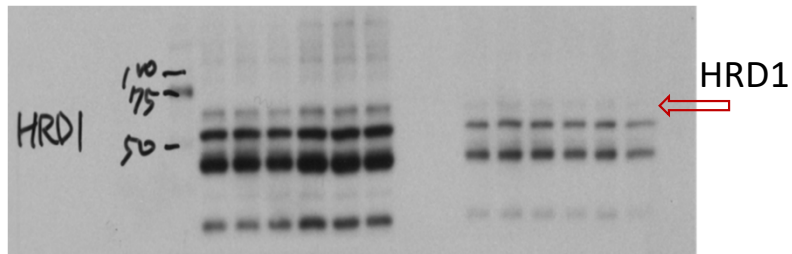

**Figure 2G:** Western blot image for HRD1. The arrow shows the cropped ROI.

## Uncropped immunoblots for Figure 2G

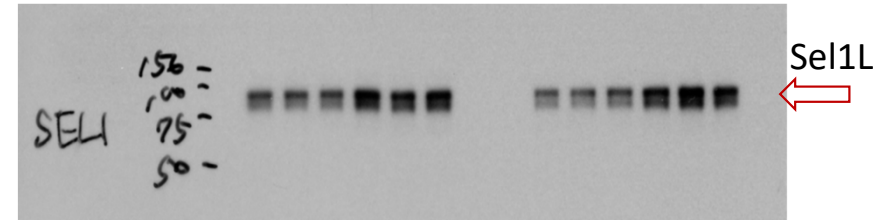

**Figure 2G:** Western blot image for Sel1L. The arrow shows the cropped ROI.

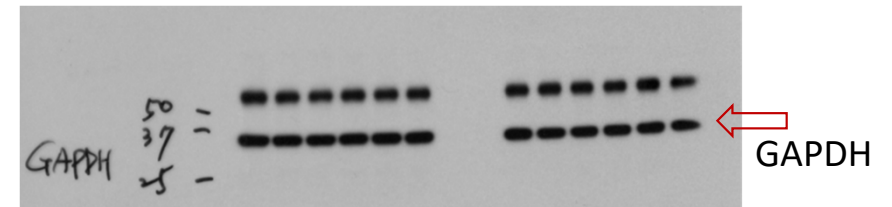

**Figure 2G:** Western blot image for GAPDH. The arrow shows the cropped ROI.

Uncropped immunoblots for **Figure 3B**

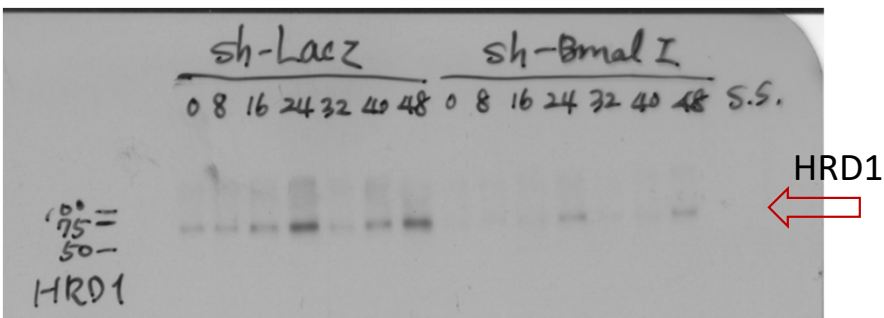

**Figure 3B:** Western blot for HRD1. The arrow shows the cropped ROI.

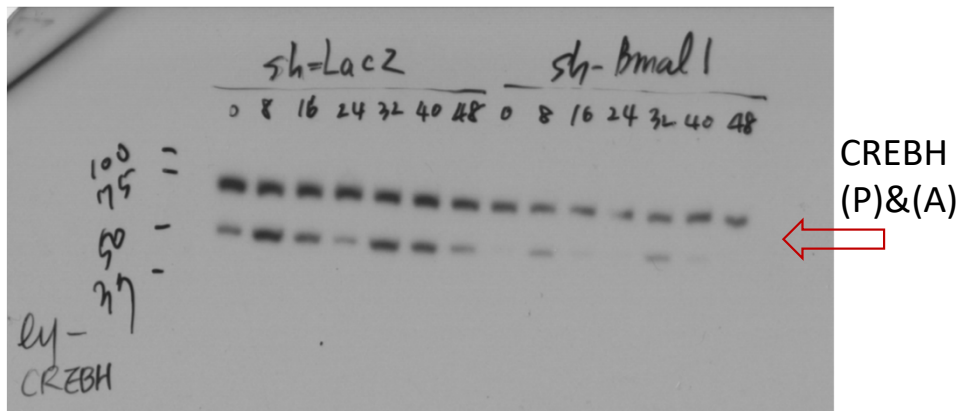

**Figure 3B:** Western blot for CREBH. The arrow shows the cropped ROI.

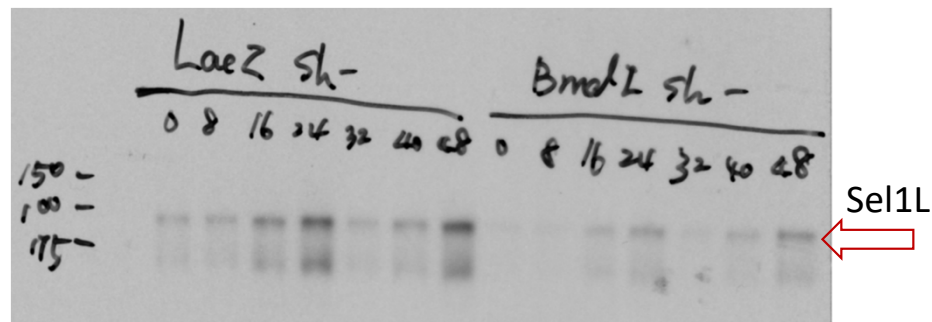

**Figure 3B:** Western blot for Sel1L. The arrow shows the cropped ROI.

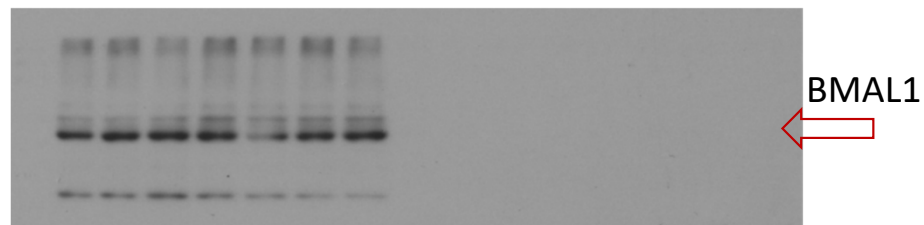

**Figure 3B:** Western blot for BMAL1. The arrow shows the cropped ROI.

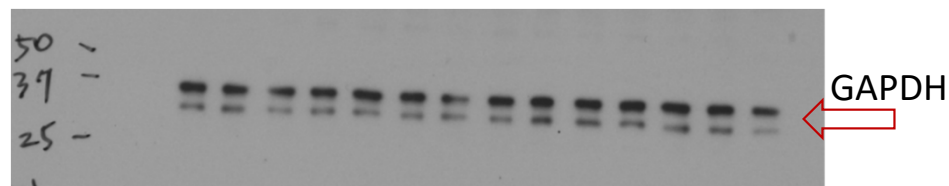

**Figure 3B:** Western blot for GAPDH. The arrow shows the cropped ROI.

## Uncropped immunoblots for **Figure 3C**

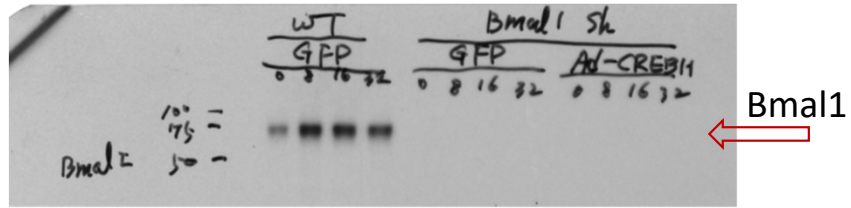

**Figure 3C:** Western blot image for Bmal1. The arrow shows the cropped ROI.

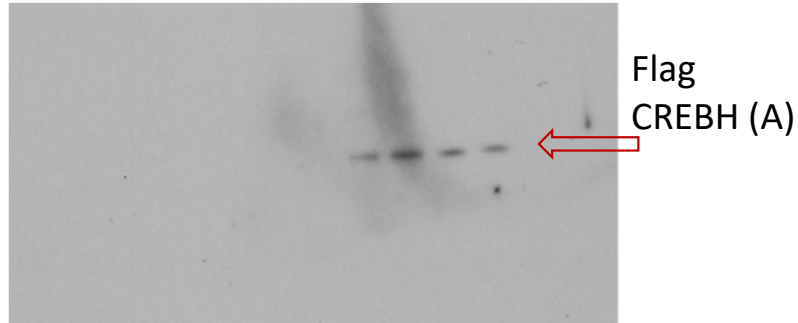

**Figure 3C:** Western blot image for Flag-CREBH(A). The arrow shows the cropped ROI.

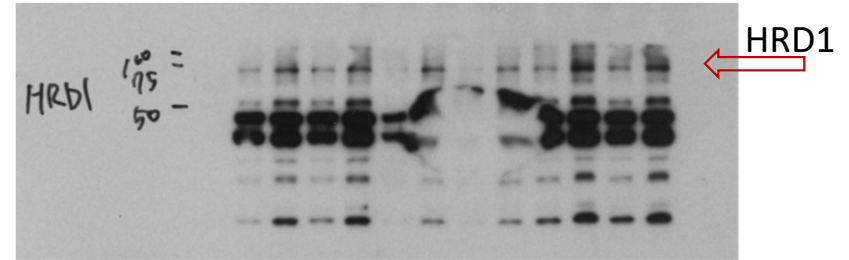

**Figure 3C:** Western blot image for HRD1. The arrow shows the cropped ROI.

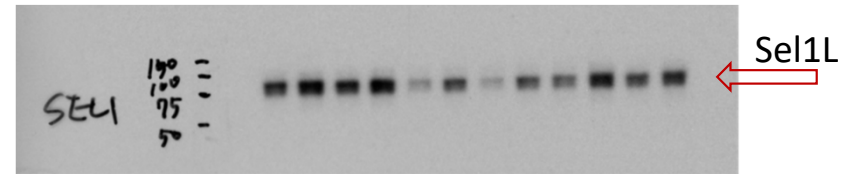

**Figure 3C:** Western blot image for Sel1L. The arrow shows the cropped ROI.

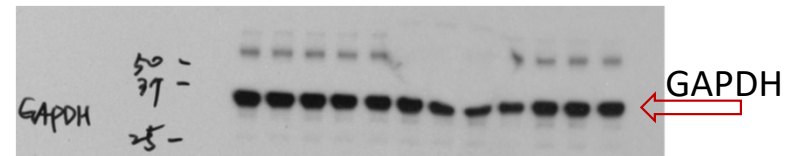

**Figure 3C:** Western blot image for GAPDH. The arrow shows the cropped ROI.

## Uncropped immunoblots for Figure 7B

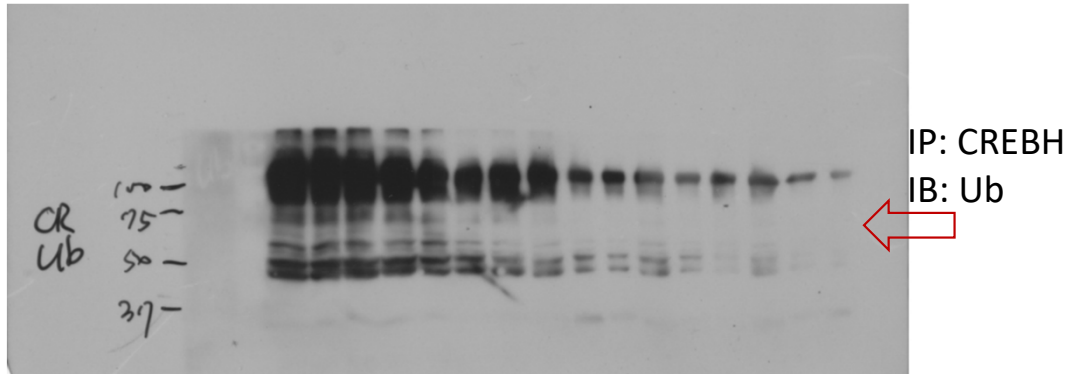

**Figure 7B:** IP-Western blot: CREBH IP and Ub IB. The arrow shows the cropped ROI.

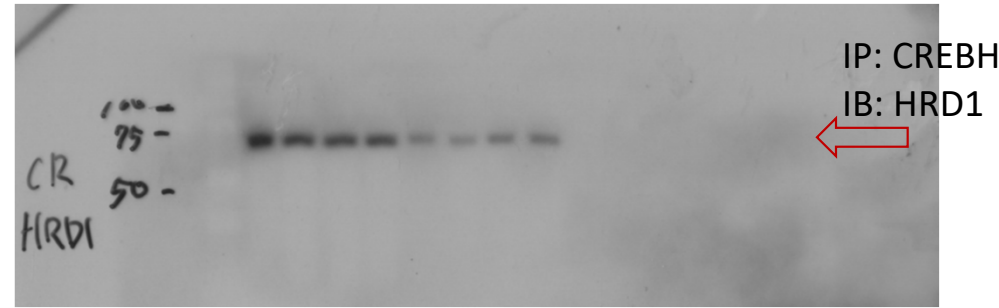

**Figure 7B:** IP-Western blot: CREBH IP and HRD1 IB. The arrow shows the cropped ROI.

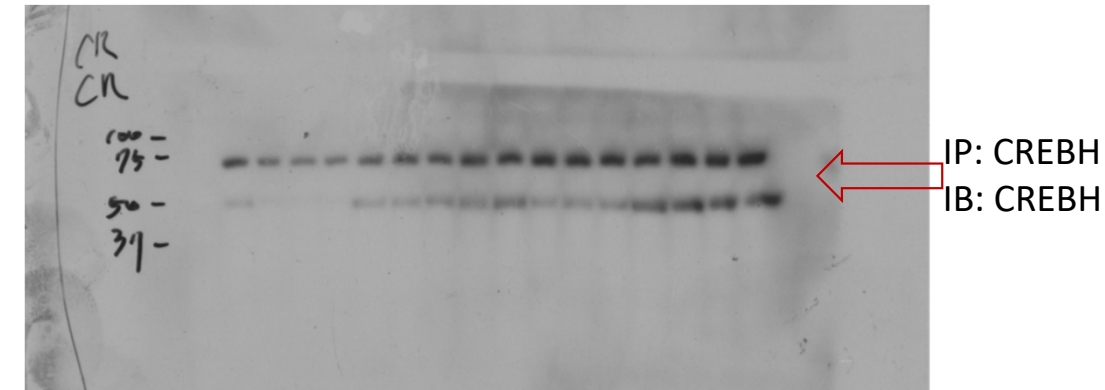

**Figure 7B:** IP-Western blot: CREBH IP and CREBH IB. The arrow shows the cropped ROI.

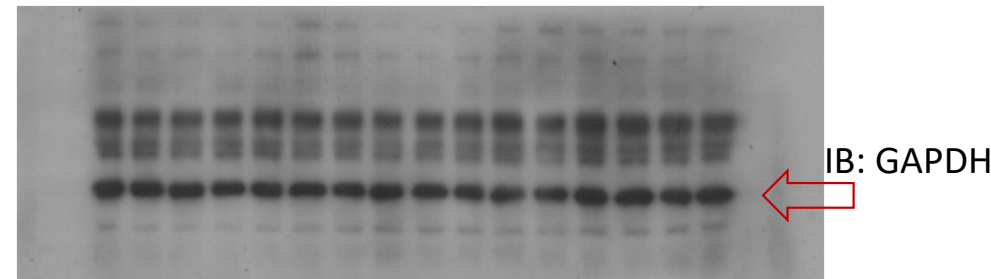

**Figure 7B:** Western blot (IB): GAPDH. The arrow shows the cropped ROI.

Uncropped immunoblots for **Figure 7C**

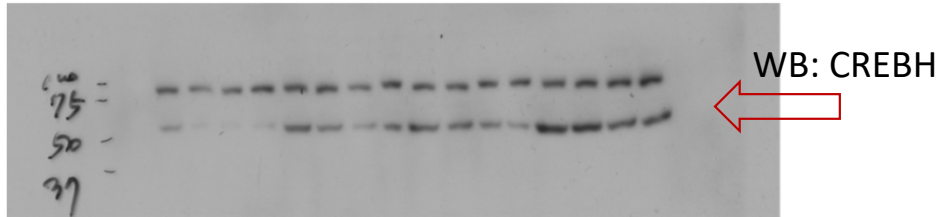

**Figure 7C:** Western blot for CREBH. The arrow shows the cropped ROI.

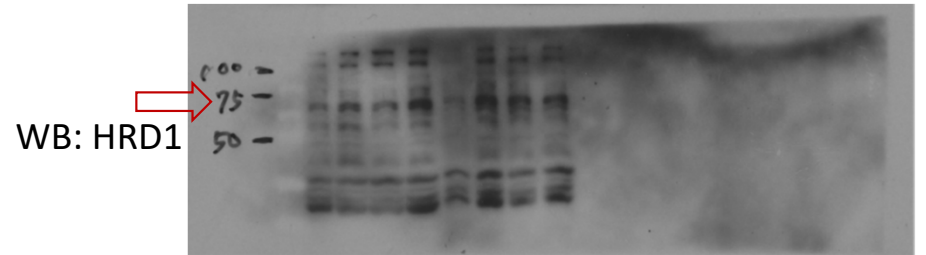

**Figure 7C:** Western blot for HRD1. The arrow shows the cropped ROI.

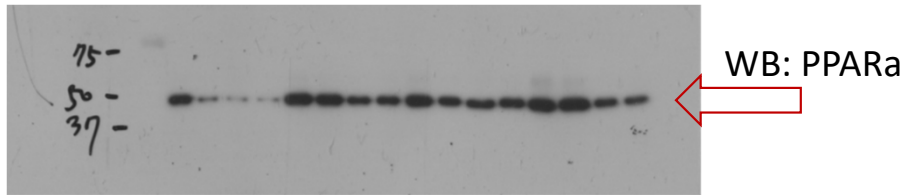

**Figure 7C:** Western blot for PPARa. The arrow shows the cropped ROI.

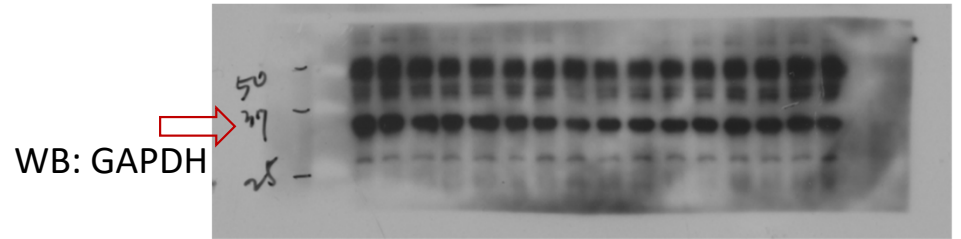

**Figure 7C:** Western blot for GAPDH. The arrow shows the cropped ROI.



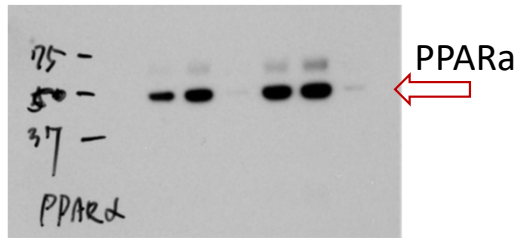

**Figure 8A:** Western blot image for PPARα. The arrow shows the cropped ROI.

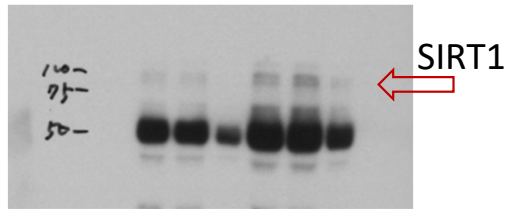

**Figure 8A:** Western blot image for SIRT1. The arrow shows the cropped ROI.

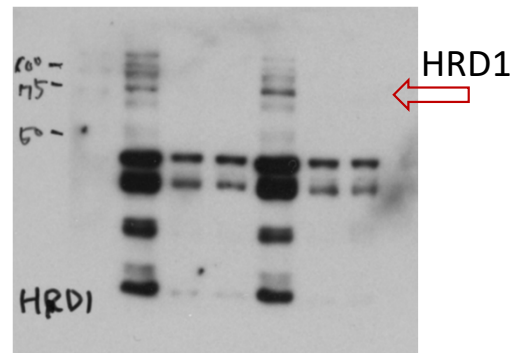

**Figure 8A:** Western blot image for HRD1. The arrow shows the cropped ROI.

## Uncropped immunoblots for **Figure 8A**

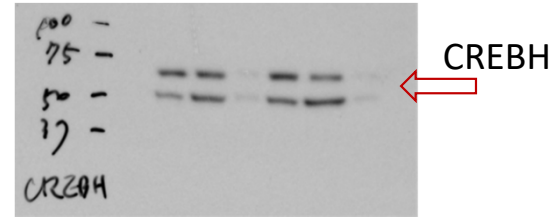

**Figure 8A:** Western blot image for CREBH. The arrow shows the cropped ROI.

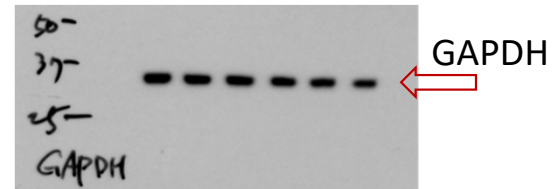

**Figure 8A:** Western blot image for GAPDH. The arrow shows the cropped ROI.
